# Supplementary material for: Ideal Combinations of Acceleration-Based Intensity Metrics and Sensor Positions to Monitor Exercise Intensity under Different Types of Sports
Source: MDPI journal article supplement (doi:10.3390/s22072583), 2022-03-28
Supplement: s1 [file s1]

**Table S1.** Change of %HRR, PL/min, and MAD among three exercise intensity levels under different sports

|            |    | %HRR                        | PL/min (AU / min)        |                          |                          | MAD (mg)                 |                        |                        |
|------------|----|-----------------------------|--------------------------|--------------------------|--------------------------|--------------------------|------------------------|------------------------|
|            |    |                             | Wrist                    | Trunk                    | Shank                    | Wrist                    | Trunk                  | Shank                  |
| Running    | L1 | 58.87 ± 15.05 <sup>††</sup> | 1915 ± 263 <sup>bc</sup> | 1198 ± 141 <sup>††</sup> | 2025 ± 150 <sup>bc</sup> | 1106 ± 155 <sup>bc</sup> | 717 ± 104 <sup>b</sup> | 658 ± 79 <sup>bc</sup> |
|            | L2 | 76.34 ± 13.46 <sup>††</sup> | 2335 ± 319 <sup>ac</sup> | 1504 ± 176 <sup>††</sup> | 2649 ± 211 <sup>ac</sup> | 1199 ± 178 <sup>a</sup>  | 761 ± 84 <sup>a</sup>  | 798 ± 65 <sup>ac</sup> |
|            | L3 | 89.34 ± 11.86 <sup>††</sup> | 2700 ± 289 <sup>ab</sup> | 1817 ± 162 <sup>††</sup> | 3372 ± 292 <sup>ab</sup> | 1247 ± 164 <sup>a</sup>  | 738 ± 77               | 943 ± 68 <sup>ab</sup> |
| Basketball | L1 | 67.76 ± 18.07 <sup>bc</sup> | 1306 ± 219 <sup>bc</sup> | 915 ± 117 <sup>††</sup>  | 1573 ± 166 <sup>††</sup> | 848 ± 101 <sup>bc</sup>  | 510 ± 52 <sup>bc</sup> | 519 ± 40 <sup>bc</sup> |
|            | L2 | 74.52 ± 17.74 <sup>ac</sup> | 1524 ± 243 <sup>ac</sup> | 1076 ± 102 <sup>††</sup> | 1822 ± 133 <sup>††</sup> | 976 ± 112 <sup>ac</sup>  | 591 ± 59 <sup>ac</sup> | 592 ± 25 <sup>ac</sup> |
|            | L3 | 80.05 ± 15.22 <sup>ab</sup> | 1690 ± 209 <sup>ab</sup> | 1215 ± 96 <sup>††</sup>  | 2095 ± 187 <sup>††</sup> | 1052 ± 91 <sup>ab</sup>  | 629 ± 64 <sup>ab</sup> | 653 ± 44 <sup>ab</sup> |
| Badminton  | L1 | 65.37 ± 14.43 <sup>bc</sup> | 1064 ± 270 <sup>c</sup>  | 966 ± 160 <sup>c</sup>   | 1625 ± 230 <sup>bc</sup> | 681 ± 122 <sup>††</sup>  | 536 ± 80 <sup>bc</sup> | 524 ± 55 <sup>bc</sup> |
|            | L2 | 73.60 ± 12.86 <sup>ac</sup> | 1150 ± 313 <sup>c</sup>  | 1030 ± 183 <sup>c</sup>  | 1732 ± 284 <sup>ac</sup> | 727 ± 144 <sup>††</sup>  | 565 ± 87 <sup>ac</sup> | 553 ± 64 <sup>ac</sup> |
|            | L3 | 82.21 ± 10.66 <sup>ab</sup> | 1307 ± 337 <sup>ab</sup> | 1157 ± 184 <sup>ab</sup> | 1941 ± 322 <sup>ab</sup> | 788 ± 151 <sup>††</sup>  | 593 ± 87 <sup>ab</sup> | 595 ± 58 <sup>ab</sup> |

L=intensity level.

Bonferroni post hoc test: significantly different than <sup>a</sup>L1, <sup>b</sup>L2, and <sup>c</sup>L3,  $p < .05$ .

Wilcoxon signed rank test: significantly different than <sup>†</sup>L1, <sup>††</sup>L2, and <sup>†††</sup>L3,  $p < .05$ .

**Table S2.** The within-sport Pearson ( $r$ ) and across-sports Spearman ( $\rho$ ) correlation coefficient for %HRR and PL as well as %HRR and MAD.

|       |     | Running |         | Basketball |         | Badminton |         | Across-sports |         |
|-------|-----|---------|---------|------------|---------|-----------|---------|---------------|---------|
|       |     | $r$     | $p$     | $r$        | $p$     | $r$       | $p$     | $\rho$        | $p$     |
| Wrist | PL  | 0.762   | 0.000** | 0.536      | 0.000** | 0.587     | 0.000** | 0.342         | 0.000** |
|       | MAD | 0.448   | 0.003** | 0.603      | 0.000** | 0.621     | 0.000** | 0.322         | 0.000** |
| Trunk | PL  | 0.451   | 0.003** | 0.463      | 0.002** | 0.608     | 0.000** | 0.390         | 0.000** |
|       | MAD | 0.065   | 0.684   | 0.403      | 0.008** | 0.314     | 0.043*  | 0.207         | 0.020*  |
| Shank | PL  | 0.777   | 0.000** | 0.628      | 0.000** | 0.793     | 0.000** | 0.547         | 0.000** |
|       | MAD | 0.778   | 0.000** | 0.604      | 0.000** | 0.782     | 0.000** | 0.484         | 0.000** |

\* $p < .05$ ; \*\* $p < .01$
